# Supplementary material
Source: PubMed Central journal article supplement (PMC7930424)

Supplemental Figures for:  
 Phase II Trial of Neoadjuvant Carboplatin and Nab-Paclitaxel in Patients with Triple Negative Breast Cancer  
 Yuan Yuan et al.

**Supplemental Figure 1.** Diagram of patient distribution. Numbers of patient with pathology responses (black), mRNA array (green), and genetic or germline mutation testing (blue) are shown. pCR, pathological complete response; pts, patients

Yuan Supplemental Figure 1: Top

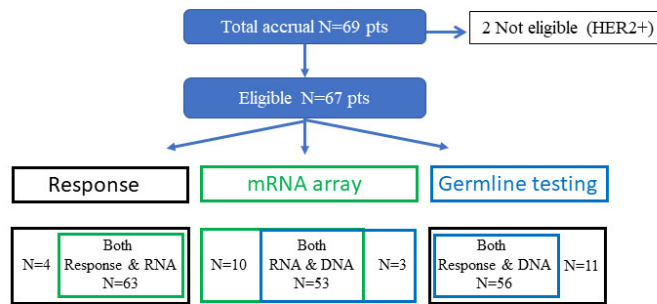

**Supplemental Figure 2.** Pathological response and DRD mutations (N=66\*). Size of bar graph depicts the pathological response among patients with the numbers of patients within each RCB class and DRD group. WT, wild type; pCR, pathological complete response; RCB, residual cancer burden. \*One patient progressed and did not receive surgery (no RCB status represented in this graph). Unknown, patient not eligible for genetic testing per NCCN guideline.

Yuan Supplemental Figure 2: Top

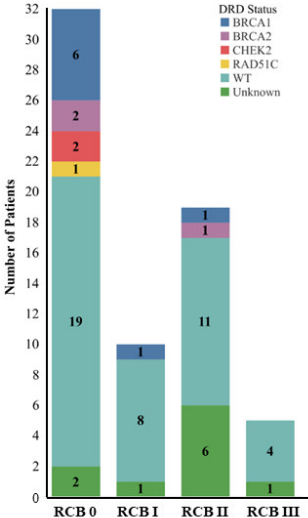

Supplement: ONCO-26-e382-s001.pdf [file ONCO-26-e382-s001.pdf]
